# Supplementary material for: Self-Help to Reduce Body-Focused Repetitive Behaviors via Video or Website? A Randomized Controlled Trial
Source: Springer Nature journal article supplement (doi:10.1007/s10608-023-10456-8), 2024-01-11
Supplement: MOESM1 [file 26619952]

**Online appendix**

**Online appendix Table 3**

*Subjective appraisal of participants who viewed the self-help website or the self-help videos at least once*

| Item | Website  (*n* = 42) | Video  (*n* = 41) | Statistics  [Differences between website and video condition in square brackets] |
| --- | --- | --- | --- |
| How do you rate the quality of the self-help program? (excellent (1), good (2) vs. less good (3), not good (4)) | 2.05  (0.38)  [90.5%] | 2.00  (0.55)  [85.3%] | *t* (81) = 0.46, *p* = .646, *d* = .101 |
| Did you receive the type of treatment you expected to receive? (not at all (1), not really (2) vs. in general yes (3), yes absolutely (4)) | 2.67  (0.53)  [69.0%] | 2.73  (0.67)  [65.9%] | *t* (81) = 0.49, *p* = .624, *d* = .108 |
| To what extent did the self-help program met your needs? (it met all of my needs (1), it met most of my needs (2) vs. it met few of my needs (3), it did not meet my needs (4)) | 2.45  (0.63)  [57.2%] | 2.39  (0.70)  [53.7%] | *t* (81) = 0.42, *p* = .673, *d* = .093 |
| Would you recommend the self-help program to a friend with similar symptoms? (definitely not (1), probably not (2) vs. probably yes (3), absolutely (4)) | 3.14  (0.65)  [90.5%] | 3.02  (0.69)  [78.1%] | *t* (81) = 0.81, *p* = .421, *d* = .177 |
| How happy are you about the extent of the help you have received through using the self-help program? (dissatisfied (1), somewhat dissatisfied (2) vs. mostly satisfied (3), very satisfied (4)) | 2.67  (0.57)  [66.7%] | 2.68  (0.61)  [61.0%] | *t* (81) = 0.12, *p* = .900, *d* = .028 |
| Did the self-help program help you cope with your problems more successfully? (yes, it helped me absolutely (1), yes, it helped me a little (2) vs. no, it did not help me that much (3), no, it did not help me at all (4)) | 2.33  (0.53)  [64.3%] | 2.27  (0.74)  [56.1%] | *t* (81) = 0.46, *p* = .647, *d* = .101 |
| How satisfied are you with the self-help program in general? (very satisfied (1), mostly satisfied (2) vs. somewhat unsatisfied (3), unsatisfied (4)) | 2.17  (0.49) [78.6%] | 2.29  (0.72) [56.1%] | *t* (81) = 0.93, *p* = .353, *d* = .206 |
| Would you use the self-help program again? (definitely not (1), probably not (2) vs. probably yes (3), yes (4)) | 2.93  (0.75)  [78.5%] | 2.83  (0.83)  [65.9%] | *t* (81) = 0.57, *p* = .569, *d* = .126 |

*Note*. Mean scores and standard deviations are in parentheses; percentages in square brackets are totals of the two positive response options.

**Online appendix Table 4**

*Subjective appraisal of participants who viewed the self-help website or the self-help videos at least once (measured with a self-developed questionnaire on the differential effectiveness of the self-help program)*

| Item | Website  (*n* = 42) | Video  (*n* = 41) | Statistics  [Differences between video and website in square brackets] |
| --- | --- | --- | --- |
| I think the self-help program is good for self-help and self-guidance. | 3.71  (0.77)  [95.2%] | 3.59  (0.87) [90.2%] | *t* (81) = 0.72, *p* = .476*, d* = .157 |
| My BFRB (e.g., nail biting, trichotillomania) decreased because of my application of the self-help program. | 2.33  (0.95)  [38.1%] | 2.59  (1.30) [46.3%] | *t* (81) = 1.01, *p* = .317*, d* = 221 |
| I could understand the content of the self-help program. | 4.05  (0.54)  [100%] | 4.20  (0.78) [95.1%] | *t* (81) = 1.00, *p* = .319*, d* = .220 |
| I think the self-help program was useful. | 3.50  (0.83)  [90.5%] | 3.49  (1.05) [78.1%] | *t* (81) = 0.06, *p* = .953*, d* = .013 |
| I was able to use the self-help program on a regular basis during the past weeks. | 1.86  (0.98)  [21.4%] | 2.20  (1.23) [31.7%] | *t* (81) = 0.12, *p* = .169*, d* = .305 |
| I had to force myself to use the self-help program. | 3.64  (1.23)  [83.4%] | 3.22  (1.31) [73.1%] | *t* (81) = 0.49, *p* = .133*, d* = .333 |
| The self-help program is not applicable to my BFRB. | 2.55  (0.99)  [23.8%] | 1.95  (1.05)  [31.7%] | *t* (81) = 0.06, *p* = .996*, d* = .001 |
| Due to the self-help program, I have reduced my BFRB (e.g., nail biting, trichotillomania). | 3.86  (0.95)  [52.3%] | 2.66  (1.26)  [51.2%] | *t* (81) = 0.07, *p* = .656*, d* = .098 |
| Would you use the self-help program again? | 3.69  (0.84)  [92.9%] | 3.61  (1.05) [78%] | *t* (81) = 0.10, *p* = .699*, d* = .085 |

*Note*. Mean scores and standard deviations are in parentheses; percentages in square brackets are totals of the two positive response options.
